# Supplementary material for: Yedoma Ice Complex of the Buor Khaya Peninsula (southernLaptev Sea)
Source: Copernicus journal article supplement (doi:10.5194/bg-2016-283), 2016-08-02

## **Supporting online material of**

### **Yedoma Ice Complex of the Buor Khaya Peninsula (southern Laptev Sea)**

Lutz Schirrmeister<sup>1</sup>, Georg Schwamborn<sup>1</sup>, Pier Paul Overduin<sup>1</sup>, Jens Strauss<sup>1</sup>, Margret C. Fuchs<sup>2</sup>, Mikhail Grigoriev<sup>3</sup>, Irina Yakshina<sup>4</sup>, Janet Rethemeyer<sup>5</sup>, Elisabeth Dietze<sup>6</sup>, Sebastian Wetterich<sup>1</sup>

<sup>1</sup>Department of Periglacial Research, Alfred Wegener Institute Helmholtz Center for Polar and Marine Research, Potsdam, D-14473, Germany

<sup>2</sup>Helmholtz Institute Freiberg for Resource Technology, Helmholtz-Zentrum Dresden-Rossendorf, Freiberg, D-09599, Germany

<sup>3</sup>Melnikov Permafrost Institute, Siberian Branch of the Russian Academy of Science, Yakutsk, 677010, Russia

<sup>4</sup>Lena Delta Reserve, Tiksi, 678400, Russia

<sup>5</sup>Institute of Geology and Mineralogy, University of Cologne, D-50674, Germany

<sup>6</sup>GFZ German Research Centre for Geosciences, Section 5.2 Climate Dynamics and Landscape Evolution, Potsdam, D-14473, Germany

*Correspondence to:* Lutz Schirrmeister (lutz.schirrmeister@awi.de)

**SOM 1.** Detailed cryolithological description of the BK-8 core.

| <b>Depth<br/>[m bs]</b> | <b>Height<br/>[m asl]</b> | <b>Sediment</b>                                                                                                        | <b>Cryostructure</b>                                                                                                                      |
|-------------------------|---------------------------|------------------------------------------------------------------------------------------------------------------------|-------------------------------------------------------------------------------------------------------------------------------------------|
| 0-0.1                   | 34.0-33.9                 | dark-brown silty fine sand, plant remains, roots, blades of grass                                                      | irregular fine                                                                                                                            |
| 0.1-0.25                | 33.9-33.75                | silty fine sand, brown spots, plant remains at 0.11-0.15, changeover from brown-grey-brown, plant remains horizontally | 0.1-0.15 transverse-diagonal lens-like<br>0.15-0.25 horizontal fine lens-like                                                             |
| 0.25-0.35               | 33.75-33.65               | brown, silty fine sand, roots                                                                                          | from micro to fine to massive ice lenses                                                                                                  |
| 0.35-0.45               | 33.65-33.55               | grey-brown silty fine sand, peat inclusions, cryoturbated                                                              | ice lenses 1-2 cm long and 1mm thick                                                                                                      |
| 0.45-0.55               | 33.55-33.45               | grey-brown silty fine sand                                                                                             | coarse lens-like, 1 -2 cm long and 3 mm thick; sediment blocks 0.5-1 cm thick and 1-2 cm long                                             |
| 0.55-0.85               | 33.45-33.15               | grey silty fine sand, 0.5-2 cm plant remains                                                                           | coarse lens-like vertical ice lenses, 3-5 cm long and 2-5 mm thick                                                                        |
| 0.85-1.8                | 33.15-32.2                | grey-brown, silty fine sand, woody plant remains                                                                       | irregular vertical ice veins, 1-5 mm thick and 10-15 cm long, Polosatik? (fragments of ice wedges)                                        |
| 1.8-2.1                 | 32.2-31.9                 | grey-brown silty fine sand, plant detritus up to 2 mm thick and 1 cm long,                                             | very irregular ice lenses; mostly ice in lower part of the section because of cutting ice veins                                           |
| 2.1-2.4                 | 31.9-31.6                 | grey-brown silty fine sand, small plant remains (< 2 mm)                                                               | Subvertically-orientated lenses with reticulated structure                                                                                |
| 2.4-3.00                | 31.6-31.0                 | grey-brown silty fine sand, some plant remains <0.5cm                                                                  | subvertical ice veins <10 cm long <1cm thick, in some sections fine ice lenses alternate with coarse ice lenses                           |
| 3.00-3.15               | 31.0-30.85                |                                                                                                                        | mostly clear, very coarse lens-like ice-poor sediment inclusions                                                                          |
| 3.15-3.40               | 30.85-30.6                | few grey-brown silty fine sand                                                                                         | massive ice, in the upper part some air bubbles, in the lower part entrapped air, horizontal ice bands, upper part milky, lower part grey |
| 3.40-7.60               | 30.6-26.4                 |                                                                                                                        | clear ice with sediment inclusions and parallel-oriented sediment stripes up to 5 mm thick, gas bubbles <1mm in diameter (no orientation) |
| 7.60-8.35               | 26.4-25.65                |                                                                                                                        | clear ice with distinct 1-2mm wide sediment stripes, orientation of bubbles indicated                                                     |
| 8.35-8.75               | 25.65-25.25               | grey-brown silty fine sand, leaf remains <1 cm                                                                         | ice-wedge contact zone, diagonal coarse lens-like ice lenses 1-3 cm long and 1-5 mm thick                                                 |
| 8.75-9.60               | 25.25-24.4                | grey-brown silty fine sand, plant remains <2-5 mm                                                                      | Vertical-reticulated coarse ice lenses, 2-10 cm long and <1cm thick; sediment blocks 1-2 cm long and 2-5m thick                           |
| 9.60-9.95               | 24.4-24.05                | grey-brown silty fine sand, yellow-brownish spots, single plant remains                                                | vertical to diagonal coarse lens-like ice lenses, 2-4 mm long and 2-5 mm thick                                                            |
| 9.95-10.65              | 24.05-23.35               | grey-brown silty fine sand, brownish spots                                                                             | fine lens-like reticulated ice lenses 0.5-1 cm long and 1-2 m thick, different orientation from top to bottom                             |
| 10.30-10.65             | 23.7-23.35                | grey silty fine sand, single plant remains                                                                             | coarse reticulated ice-rich sediment blocks, ice lenses 2-4 cm long and 2-7 mm thick,                                                     |

|             |             |                                                                                                                                           |                                                                                                                                                                                                                                                                         |
|-------------|-------------|-------------------------------------------------------------------------------------------------------------------------------------------|-------------------------------------------------------------------------------------------------------------------------------------------------------------------------------------------------------------------------------------------------------------------------|
| 10.65-10.72 | 23.35-23.28 | grey silt                                                                                                                                 | diagonal fine lens-like ice veins 1 mm thick. and long ice veins <5cm long and 2 mm thick                                                                                                                                                                               |
| 10.72-10.95 | 23.28-23.05 | partly isolated grey-brown sediment, few organics                                                                                         | horizontal, coarse lens-like reticulated ice veins, 1-2 cm long and 1-3 mm thick                                                                                                                                                                                        |
| 10.95-11.10 | 23.05-22.9  | grey silt, few organics                                                                                                                   | fine lens-like (sub-mm), transition towards coarser lens-like                                                                                                                                                                                                           |
| 11.10-11.20 | 22.9-22.8   | grey silt, organic inclusions                                                                                                             | lens-like reticulated                                                                                                                                                                                                                                                   |
| 11.20-11.40 | 22.8-22.6   | laminated sediment inclusions in 11.40-11.30, brown-yellow spots                                                                          | fine ice lenses 1-2m thick, 2-5m long                                                                                                                                                                                                                                   |
| 11.40-11.55 | 22.6-22.45  | few organic, yellow- brownish spots                                                                                                       | coarse lens-like reticulated                                                                                                                                                                                                                                            |
| 11.55-11.70 | 22.45-22.3  | finely grained (fine sand/silt), plant remains                                                                                            | fine lens-like, coarse lamination ice bands at 11.60                                                                                                                                                                                                                    |
| 11.70-12.55 | 22.3-21.45  | brown-grey to dark grey, silty fine sand color-darkness increases from top to bottom, numerous plant remains incl. woody roots up to 4 mm | fine lens-like ice lenses (upper 10 cm), followed by vertical ice lenses 10-15 mm long, sub-horizontal single ice bands at 12.20 and at 12.30 at 12.45-12.55 transition from blocky to reticulated ice-rich sub-horizontal                                              |
| 12.55-12.70 | 21.45-21.3  | brownish grey silt                                                                                                                        | fine lens-like, diagonal <0.5m, transition from ice-rich to less ice-rich sections                                                                                                                                                                                      |
| 12.70-12.80 | 21.3-21.2   | brownish grey silt, few organic remains,                                                                                                  | coarse lens-like, reticulated, blocky                                                                                                                                                                                                                                   |
| 12.80-12.95 | 21.2-21.05  | brownish grey silt, , organic remains, non-cut core segment taken from lower part (lower 2 cm) for OSL dating                             | fine lens-like ice-rich and coarse lens-like ice bands                                                                                                                                                                                                                  |
| 12.95-13.10 | 21.05-20.9  | grey silt, large plant remains incl. woody roots <0.5 cm,                                                                                 | coarse lens-like horizontal-diagonal ice veins 1-4 cm long                                                                                                                                                                                                              |
| 13.10-13.35 | 20.9-20.65  | grey brown silty fine sand, partly big plant remains with ice crusts                                                                      | upper 2 cm massive ice with single ice veins, followed by fine lens-like ice veins (middle 15 cm), then small lens-like 1-2 mm ice bands (lower 8 cm)                                                                                                                   |
| 13.35-13.50 | 20.65-20.5  | grey brown silty fine sand, few organics                                                                                                  | ice bands, 2 cm thick at the top, followed by coarse lens-like, blocky                                                                                                                                                                                                  |
| 13.50-13.60 | 20.5-20.4   | grey brown silty fine sand, few organics                                                                                                  | coarse lens-like reticulated (1-2 x 1-2 cm)                                                                                                                                                                                                                             |
| 13.60-14.15 | 20.4-19.85  | grey brown silty fine sand, few organics                                                                                                  | subhorizontal lens-like ice bands, 0.5-2 cm thick                                                                                                                                                                                                                       |
| 14.15-14.25 | 19.85-19.75 | grey brown silty fine sand, few organics                                                                                                  | fine lens-like, horizontal, single subvertical ice veins                                                                                                                                                                                                                |
| 14.25-14.50 | 19.75-19.5  | grey brown silty fine sand, few organics                                                                                                  | 14.25-14.30: lens-like (0.5-1 cm long, <1mm thick), single vertical ice veins, ice bands<br>14.30-14.40: blocky , ice veins 2-5 cm long 1-2 mm thick, sediment blocks 1-2 mm long 2-5m thick,<br>14.40-14.50: coarse lens-like isolated ice blocks 0.5-1 cm in diameter |
| 14.50-14.65 | 19.5-19.35  | grey brown silty fine sand, organics < 1cm                                                                                                | blocky, ice veins 2-5 cm long 1-2 m thick, sediment blocks 1-2 x 1-2 cm                                                                                                                                                                                                 |

|             |             |                                                                                         |                                                                                                                                                                                                                                                                                                          |
|-------------|-------------|-----------------------------------------------------------------------------------------|----------------------------------------------------------------------------------------------------------------------------------------------------------------------------------------------------------------------------------------------------------------------------------------------------------|
| 14.65-14.95 | 19.35-19.05 | grey brown silty fine sand, woody remains up to 10 mm                                   | irregular fine lens-like subvertical ice veins with ice crusts at the organic remains                                                                                                                                                                                                                    |
| 14.95-15.35 | 19.05-18.65 | grey brown silty fine sand, organic remains decrease from top to bottom                 | blocky, with several ice bands at: 14.95m-15.15m, 15.25m-15.30m<br>horizontal ice veins 1-2cm long 1-2 cm thick, vertical ice veins 3-7 cm long 1cm thick                                                                                                                                                |
| 15.35-15.45 | 18.65-18.55 | dark grey, clay rich silt, no organics                                                  | 15.35-15.38: blocky (see above)<br>15.38-15.45: massive ice with sediment bands                                                                                                                                                                                                                          |
| 15.45-15.90 | 18.55-18.1  | grey brown silty fine sand, no organics                                                 | 15.45-15.54: massive ice with sediment bands<br>15.54-15.62: blocky, ice veins 1m thick and 1-3 cm long<br>15.62-15.70: ice-rich with isolated 0.5-1 cm long sediment blocks, ice bands<br>15.70-15.80: lens to coarse lens-like, increasing downwards<br>15.80-15.90: massive ice crystals 1-2 cm large |
| 15.90-16.00 | 18.1-18.0   | grey brown silty fine sand, few organics, non-cut core segment                          | fine lens-like                                                                                                                                                                                                                                                                                           |
| 16.00-16.20 | 18.0-17.8   | grey brown silty fine sand, few organics                                                | horizontal lens to fine lens-like and massive at 16.00, 16.08, and 16.18 m, lower 2 cm coarse lens-like horizontal ice veins                                                                                                                                                                             |
| 16.25-16.55 | 17.8-17.45  | grey brown silty fine sand, few organics, non-cut core segment for OSL dating           | transition from coarse to fine vertical ice veins                                                                                                                                                                                                                                                        |
| 16.55-16.70 | 17.45-17.3  | grey brown silty fine sand, few organics                                                | transition from isolated sediment blocks 0.5-1 cm in diameter to horizontal fine lens-like                                                                                                                                                                                                               |
| 16.70-16.90 | 17.3-17.1   | grey brown silty fine sand, few organics                                                | transition from coarse to fine to micro lens-like, single organic remains                                                                                                                                                                                                                                |
| 16.90-17.00 | 17.1-10.0   | grey brown silty fine sand, plant remains horizontally distributed                      | micro lens-like, relatively ice poor                                                                                                                                                                                                                                                                     |
| 17.00-17.05 | 17.0-16.95  | grey brown silty fine sand, 1cm frozen drill mud                                        | coarse, reticulated, blocky, ice-rich ice lenses 1-2 cm long and 1-2 mm thick                                                                                                                                                                                                                            |
| 17.05-17.70 | 16.95-16.3  | grey brown silty fine sand, plant remains distributed                                   | horizontal, micro lens-like                                                                                                                                                                                                                                                                              |
| 17.70-17.95 | 16.3-16.05  | grey brown silty fine sand, woody remains up to 2 mm                                    | transition from coarse to fine ice lenses, horizontal to diagonal transversal, single organic remains                                                                                                                                                                                                    |
| 17.95-18.30 | 16.05-15.7  | grey brown silty fine sand, plant remains < 1 cm long                                   | transition from micro to fine lens-like, single subvertical ice veins 1-3 cm long                                                                                                                                                                                                                        |
| 18.30-18.40 | 15.7-15.6   | grey-brown silty fine sand, few organics (probably frozen drill mud!)                   | fine lens-like                                                                                                                                                                                                                                                                                           |
| 18.40-18.50 | 15.6-15.5   | grey brown silty fine sand, single plant remains <1 mm                                  | horizontal fine- to micro lens-like                                                                                                                                                                                                                                                                      |
| 18.50-18.70 | 15.5-15.3   | grey brown silty fine sand, single plant remains <1 mm                                  | irregular lens-like                                                                                                                                                                                                                                                                                      |
| 18.70-18.90 | 15.3-15.1   | grey brown silty fine sand, single organic remains, non-cut core segment for OSL dating | horizontal, lenses to fine lenses                                                                                                                                                                                                                                                                        |



**SOM 2.** Cryolithological examples of different units of the BK-8 permafrost core (A-C: Active layer and Lateglacial to early Holocene cover, D-E: ice wedge, F-G: Yedoma contact zone, H-J: Yedoma horizontal bedding, K-L: salty Yedoma).

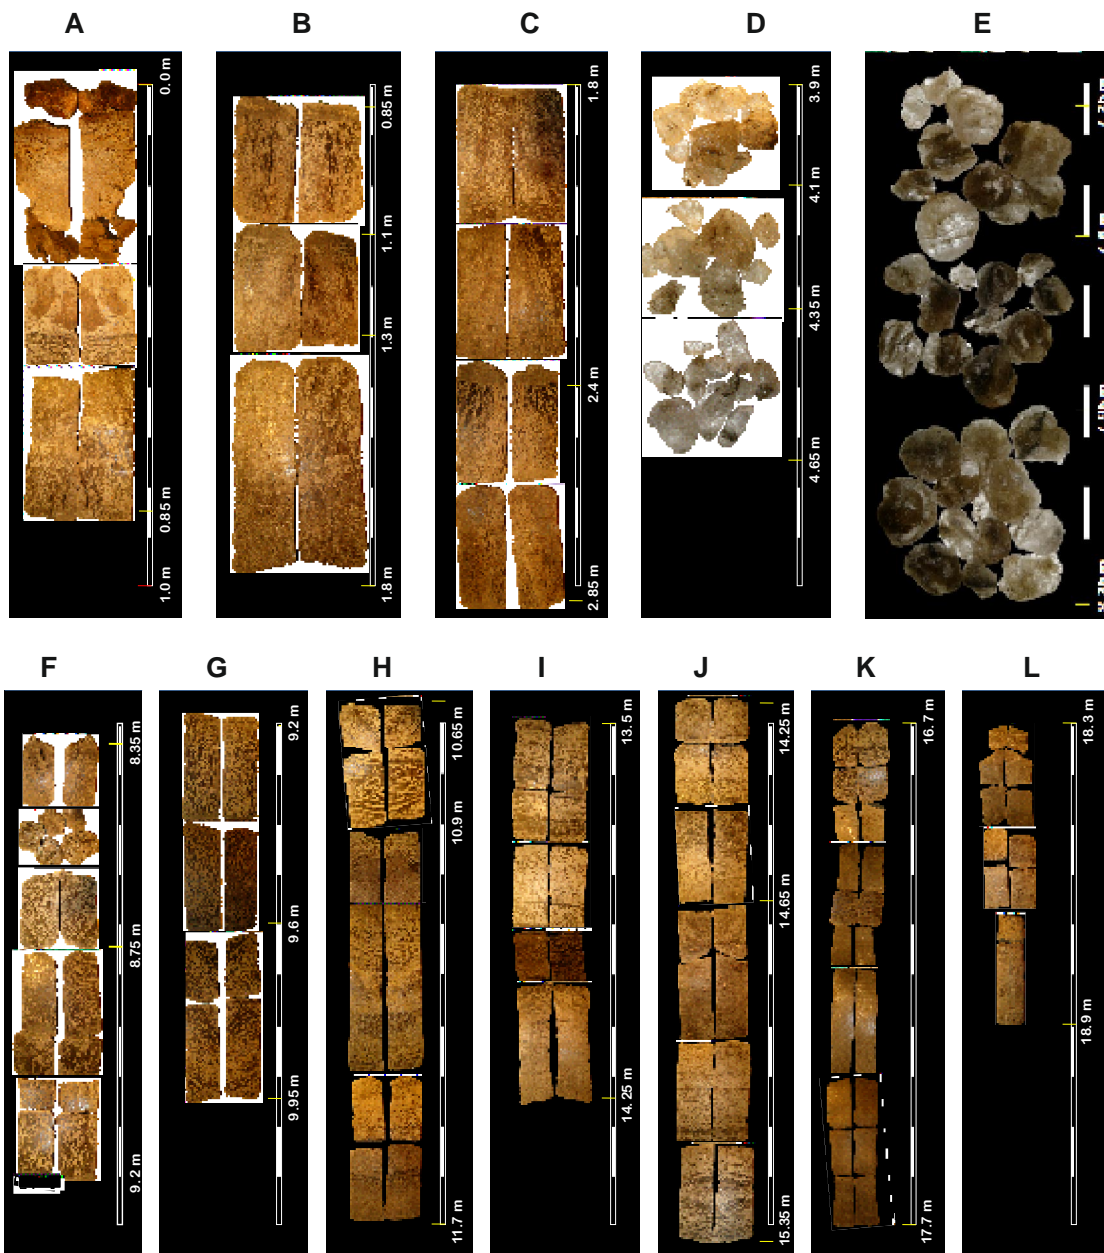

Supplement: Supplementary file 1 [file bg-2016-283-supplement.pdf]
